# Supplementary material
Source: PubMed Central journal article supplement (PMC1242315)

# PARP-2 and Aurora-B Association

- A) GST-pulldown
- B) Far-Western

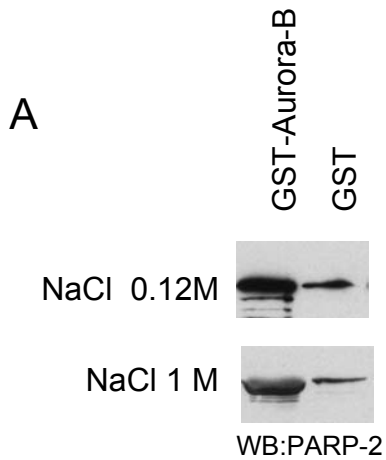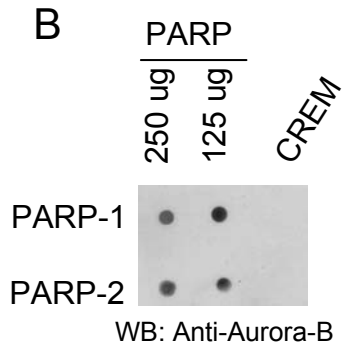

PARP-2 is able to Modify Aurora-B But not Aurora-A (*in vitro* poly(ADPribose)ylation assay)

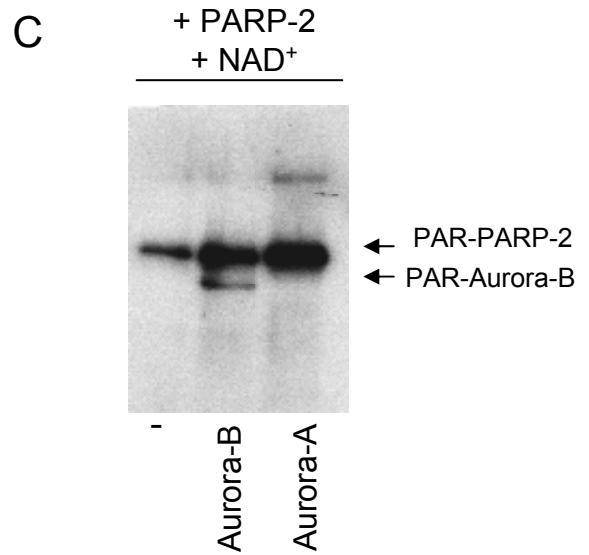

Supplement: pnas_0506252102_2.pdf [file pnas_0506252102_2.pdf]
